# Supplementary material for: Identification of Polymorphisms Associated with Drought Adaptation QTL inBrassica napusby Resequencing
Source: Oxford University Press journal article supplement (doi:10.1534/g3.115.021279), 2016-01-25

**Figure S1.** Alignment of QTL intervals from the *B. napus* and progenitor references for the QTL not shown in Figure 2.

A03

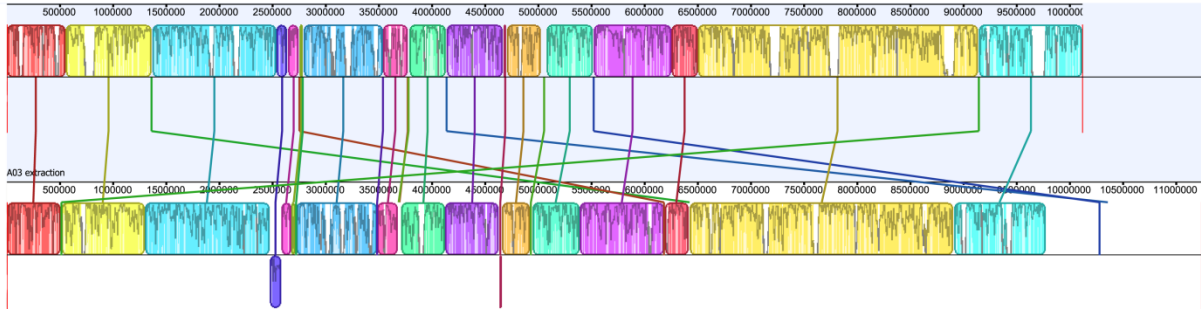

C07

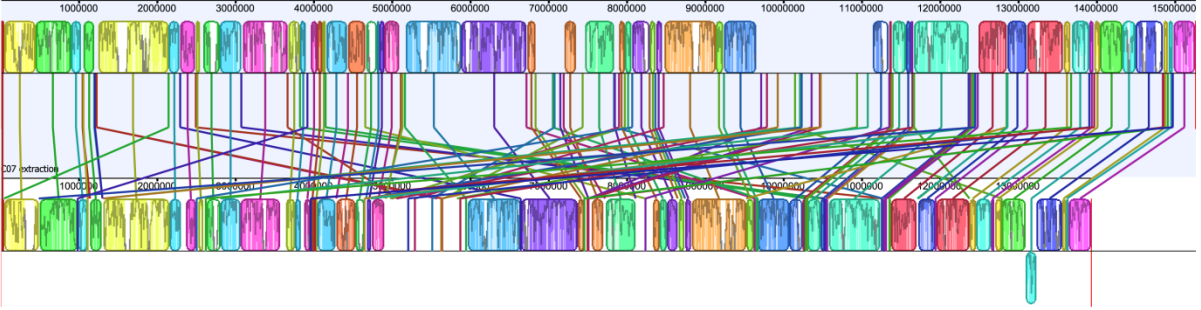

Supplement: 021279_figures1.pdf [file 021279_figures1.pdf]
