# Supplementary material for: Identification of Polymorphisms Associated with Drought Adaptation QTL in Brassica napus by Resequencing
Source: G3 (Bethesda). 2016 Jan 21;6(4):793–803. doi: 10.1534/g3.115.021279 (PMC4825650; doi:10.1534/g3.115.021279)
Supplement: Supporting Information [file supp_g3.115.021279_TableS1.xlsx]

## Sheet: Sheet1
Table S1. List of primers for Bna.FLC.A10.
Target	Forward primer	Reverse primer
First half of gene	AAATTAGGGCGCAAAGCACTG	TCAATTTCTAACGCTGGTTTTG
Second half of gene	TGGGGACTTAGAAGCAAACTG	GGATACACAAGCAAGCTCGAA
Additional sequencing primers	TGGCCATGAGAAATACATGAG	CGGAGATTTGTCCAGGTGA
	TTAATCGGAAGCGTTGTGTG	CTCGAGCCGGAGAGAGAGTA
	TCTCTAATTGTCTTCTCTGCCCT	GCCAATCGGATCGAAACTTA
	TGGTCCACCAGTGTATGGTT	AGCTTCAACATTAGTTCTGTCTGC
	TTTTGGTGGGACATTTGGAC	AACCTCACGGTAAAGAGAGAAA
	AAAAGTTGAAAGAGCTTAAGGGAGT	TGCAACAAAATCAAGGATGC
	GCTGTAAGGATGCGCCTAAG	AAAGGGTCGTTTCTGCTTTG
	ATCAAGGCAAGCTCAAAACC	CTTCCGCATCCATTTCCTAA
