# Supplementary material for: Identification of Polymorphisms Associated with Drought Adaptation QTL in Brassica napus by Resequencing
Source: G3 (Bethesda). 2016 Jan 21;6(4):793–803. doi: 10.1534/g3.115.021279 (PMC4825650; doi:10.1534/g3.115.021279)
Supplement: Supporting Information [file supp_g3.115.021279_TableS2.xlsx]

## Sheet: Sheet1
Table S2. Average noncoding, synonymous, nonsynonymous, and total SNP density between IMC106RR and Wichita across chromosomes of the A and C genomes made using the B. napus (italics) and progenitor alignments.
		SNP Rates Comparisons (%)
		Non-Coding				Synonymous				Non-synonymous
Chromosome		Progenitor		B. napus		Progenitor		B. napus		Progenitor		B. napus
A01		0.3		0.32		0.19		0.22		0.1		0.12
A02		0.18		0.16		0.09		0.11		0.06		0.07
A03		0.28		0.32		0.17		0.21		0.09		0.11
A04		0.26		0.28		0.15		0.21		0.09		0.12
A05		0.28		0.28		0.16		0.19		0.09		0.1
A06		0.22		0.2		0.14		0.15		0.08		0.08
A07		0.27		0.3		0.15		0.17		0.09		0.1
A08		0.27		0.27		0.12		0.15		0.08		0.09
A09		0.19		0.2		0.08		0.1		0.05		0.06
A10		0.31		0.3		0.19		0.2		0.1		0.11
A Genome Avg		0.26 (0.04)		0.26 (0.06)		0.14 (0.04)		0.17 (0.04)		0.08 (0.02)		0.10 (0.02)
C01		0.31		0.37		0.13		0.13		0.1		0.12
C02		0.27		0.31		0.16		0.19		0.12		0.14
C03		0.15		0.17		0.09		0.1		0.07		0.08
C04		0.19		0.18		0.08		0.07		0.07		0.07
C05		0.1		0.1		0.06		0.07		0.05		0.05
C06		0.15		0.2		0.07		0.09		0.06		0.08
C07		0.18		0.15		0.06		0.07		0.05		0.06
C08		0.13		0.13		0.06		0.06		0.05		0.06
C09		0.1		0.1		0.05		0.05		0.04		0.04
C Genome Avg		0.17 (0.07)		0.19 (0.09)		0.08 (0.04)		0.09 (0.04)		0.07 (0.02)		0.08 (0.02)
Genome-wide Avg		0.22 (0.07)		0.21 (0.08)		0.12 (0.05)		0.13 (0.06)		0.08 (0.02)		0.09 (0.03)
*Standard deviations in parentheses
