# Supplementary material for: Identification of Polymorphisms Associated with Drought Adaptation QTL in Brassica napus by Resequencing
Source: G3 (Bethesda). 2016 Jan 21;6(4):793–803. doi: 10.1534/g3.115.021279 (PMC4825650; doi:10.1534/g3.115.021279)
Supplement: Supporting Information [file supp_g3.115.021279_TableS3.xlsx]

## Sheet: Sheet1
Table S3. Selective constraint ((dN) ⁄(dS) and 95% confidence intervals) estimated for the A and C genomes. (dN)⁄(dS) ratios were estimated using both IMC-reference and Wichita-reference comparisons
Genotype	dN/dS
	A genome	C genome
IMC106RR	0.21 (0.20,0.22)	0.36 (0.33,0.38)
Wichita	0.22 (0.21, 0.23)	0.37 (0.36, 0.39)
