# Supplementary material for: Identification of Polymorphisms Associated with Drought Adaptation QTL in Brassica napus by Resequencing
Source: G3 (Bethesda). 2016 Jan 21;6(4):793–803. doi: 10.1534/g3.115.021279 (PMC4825650; doi:10.1534/g3.115.021279)
Supplement: Supporting Information [file supp_g3.115.021279_TableS4.xlsx]

## Sheet: Sheet1
Table S4. Nonsynonymous SNP density and term enrichment P-Value of GO terms enriched for genes carrying nonsynonymous substitutions.
GO_Id	nonSyn_density	P-Value
GO:0008150|biological_process	0.00278688	0
GO:0009739|response to gibberellin stimulus	0.00886918	0
GO:0016481|negative regulation of transcription	0.0175639	0
GO:0003700|transcription factor activity	0.00364108	0.001
GO:0009944|polarity specification of adaxial/abaxial axis	0.0242165	0.001
GO:0000784|nuclear chromosome, telomeric region	0.0181058	0.002
GO:0004712|protein serine/threonine/tyrosine kinase activity	0.00538031	0.002
GO:0006649|phospholipid transfer to membrane	0.0209424	0.002
GO:0010196|nonphotochemical quenching	0.0346535	0.002
GO:0017169|CDP-alcohol phosphatidyltransferase activity	0.0135039	0.002
GO:0004519|endonuclease activity	0.0227596	0.003
GO:0000741|karyogamy	0.0165394	0.004
GO:0006446|regulation of translational initiation	0.0183946	0.004
GO:0008219|cell death	0.0344828	0.004
GO:0004129|cytochrome-c oxidase activity	0.0310078	0.005
GO:0016125|sterol metabolic process	0.0206612	0.005
GO:0009626|plant-type hypersensitive response	0.0137592	0.006
GO:0030528|transcription regulator activity	0.00484004	0.006
GO:0050801|ion homeostasis	0.0181058	0.006
GO:0051555|flavonol biosynthetic process	0.0182927	0.006
GO:0009535|chloroplast thylakoid membrane	0.0131168	0.007
GO:0004148|dihydrolipoyl dehydrogenase activity	0.0255754	0.008
GO:0010475|galactose-1-phosphate guanylyltransferase (GDP) activity	0.0155483	0.008
GO:0009073|aromatic amino acid family biosynthetic process	0.00960512	0.009
GO:0051743|red chlorophyll catabolite reductase activity	0.0253968	0.009
