# Supplementary material for: Identification of Polymorphisms Associated with Drought Adaptation QTL in Brassica napus by Resequencing
Source: G3 (Bethesda). 2016 Jan 21;6(4):793–803. doi: 10.1534/g3.115.021279 (PMC4825650; doi:10.1534/g3.115.021279)
Supplement: Supporting Information [file supp_g3.115.021279_TableS5.xlsx]

## Sheet: Sheet1
Table S5. Full list of candidate genes contained within the five QTL intervals located on chromosomes A02, A03, A10, C02 and C07.
At Ortholog	Chr	Start	Stop	At ortholog description
AT5G22330	A02	4419877	4422543	ATTIP49A, RIN1; RIN1
AT5G60690	A02	4707043	4711118	REV, IFL, IFL1; REV (REVOLUTA)
AT5G60410	A02	4835102	4839772	ATSIZ1, SIZ1; SIZ1; DNA binding / SUMO ligase
AT1G65010	A02	8393132	8398623	unknown protein
AT1G68480	A02	9846695	9847093	JAG; JAG (JAGGED)
AT5G57130	A02	5886504	5892850	protein binding
AT1G67630	A02	9415061	9418532	POLA2; POLA2 (DNA POLYMERASE ALPHA 2)
AT5G55390	A02	6453413	6454408	EDM2; EDM2; transcription factor
AT5G54310	A02	6845133	6848530	AGD5; AGD5 (ARF-GAP domain 5); ARF GTPase activator/ DNA binding / zinc ion binding
AT1G14620	A03	11014181	11015479	DECOY; DECOY (DECOY)
AT2G04740	A03	19941578	19944133	ankyrin repeat family protein
AT2G06210	A03	20142067	20148351	ELF8, VIP6; ELF8 (EARLY FLOWERING 8); binding
AT2G07690	A03	20104360	20108047	MCM5; minichromosome maintenance family protein / MCM family protein
AT2G13540	A03	20229377	20235054	ENS, ABH1, CBP80, ATCBP80; ABH1 (ABA HYPERSENSITIVE 1); RNA cap binding
AT2G43370	A03	10454215	10455881	U1 small nuclear ribonucleoprotein 70 kDa, putative
AT2G43430	A03	10460100	10461894	GLX2-1; GLX2-1 (GLYOXALASE 2-1); hydroxyacylglutathione hydrolase
AT2G45650	A03	10914526	10916635	AGL6; AGL6 (AGAMOUS-LIKE 6); DNA binding / transcription factor
AT2G45650	A03	10918286	10920672	AGL6; AGL6 (AGAMOUS-LIKE 6); DNA binding / transcription factor
AT2G46340	A03	11040524	11044132	SPA1; SPA1 (SUPPRESSOR OF PHYA-105 1); protein binding / signal transducer
AT2G47310	A03	11189256	11190743	flowering time control protein-related / FCA gamma-related
AT3G02650	A03	14576888	14578579	pentatricopeptide (PPR) repeat-containing protein
AT3G10390	A03	16013218	16016354	FLD; FLD (FLOWERING LOCUS D)
AT3G21320	A03	18694015	18695906	hydroxyproline-rich glycoprotein family protein (TAIR:AT2G25930.1)
AT4G04480	A03	13181182	13182375	F-box family protein (TAIR:AT4G22030.1)
AT3G07540	A03	15565258	15566720	formin homology 2 domain-containing protein / FH2 domain-containing protein
AT3G13960	A03	16907639	16909024	AtGRF5; AtGRF5 (GROWTH-REGULATING FACTOR 5)
AT3G14190	A03	16935771	16937508	unknown protein
AT3G18520	A03	17991398	17994761	HDA15, ATHDA15; HDA15; histone deacetylase
AT3G18524	A03	17995348	17999260	MSH2, ATMSH2; MSH2 (MUTS HOMOLOG 2)
AT3G18600	A03	18028431	18031485	DEAD/DEAH box helicase, putative
AT3G18990	A03	18117731	18126862	VRN1, REM39; VRN1 (REDUCED VERNALIZATION RESPONSE 1)
AT3G20260	A03	18431989	18433396	structural constituent of ribosome
AT3G20550	A03	18507750	18510529	DDL; DDL (DAWDLE)
AT3G24120	A03	19407620	19409410	myb family transcription factor
AT3G24340	A03	19524788	19528164	chr40; chr40 (chromatin remodeling 40)
AT4G02150	A03	13763273	13765906	MOS6, ATIMPALPHA3, IMPA-3; MOS6 (MODIFIER OF SNC1, 6)
AT5G35750	A03	19998618	20003928	AHK2; AHK2 (ARABIDOPSIS HISTIDINE KINASE 2)
AT5G14080	A10	12625327	12626276	pentatricopeptide (PPR) repeat-containing protein
AT5G13790	A10	12699925	12701540	AGL15; AGL15 (AGAMOUS-LIKE 15); DNA binding / transcription factor
AT5G12430	A10	13100861	13106392	DNAJ heat shock N-terminal domain-containing protein
AT5G12410	A10	13110497	13112199	THUMP domain-containing protein
AT5G11780	A10	13293421	13295301	unknown protein
AT5G11390	A10	13461950	13464166	unknown protein
AT5G11320	A10	13484080	13486119	YUC4; YUC4 (YUCCA4); monooxygenase/ oxidoreductase
AT5G11240	A10	13508303	13511612	transducin family protein / WD-40 repeat family protein
AT5G05980	A10	15021517	15027009	ATDFB, DFB; ATDFB (A. THALIANA DHFS-FPGS HOMOLOG B)
AT5G06170	A10	14975130	14976901	ATSUC9; ATSUC9 (Sucrose-proton symporter 9)
AT5G07180	A10	14474474	14479590	ERL2; ERL2 (ERECTA-LIKE 2); kinase
AT1G44110	C02	874516	876403	CYCA1;1; CYCA1;1 (Cyclin A1;1); cyclin-dependent protein kinase regulator
AT5G14750	C02	57532	58720	WER, ATMYB66, WER1; ATMYB66 (MYB DOMAIN PROTEIN 66);
AT5G15510	C02	308793	310721	BEST Arabidopsis thaliana protein match is: unknown protein (TAIR:AT3G01015.1)
AT5G15580	C02	332411	335464	LNG1; LNG1 (LONGIFOLIA1)
AT5G16390	C02	590168	592108	CAC1, CAC1A, BCCP, BCCP1; CAC1
AT5G16490	C02	629695	630340	RIC4; RIC4 (ROP-INTERACTIVE CRIB MOTIF-CONTAINING PROTEIN 4)
AT5G16750	C02	746754	751402	TOZ; TOZ (TORMOZEMBRYO DEFECTIVE); nucleotide binding
AT5G17300	C02	891523	893376	myb family transcription factor
AT5G17330	C02	913151	916539	GAD, GAD1; GAD; calmodulin binding / glutamate decarboxylase
AT5G17400	C02	934045	935412	ER-ANT1; ER-ANT1
AT5G17690	C02	1040542	1042186	TFL2, LHP1; TFL2 (TERMINAL FLOWER 2)
AT5G17820	C02	1151083	1152687	peroxidase 57 (PER57) (P57) (PRXR10)
AT5G18520	C02	657875	659197	BEST Arabidopsis thaliana protein match is: unknown protein (TAIR:AT3G09570.1)
AT5G18560	C02	643816	644520	PUCHI; PUCHI; DNA binding / transcription factor
AT5G18580	C02	625686	628436	FASS, TON2, EMB40, FS1, GDO, FASS 2; FASS (FASS 1)
AT5G18830	C02	547334	551438	SPL7; SPL7 (SQUAMOSA PROMOTER BINDING PROTEIN-LIKE 7
AT5G20490	C02	1450596	1460051	XIK, ATXIK, XI-17; XIK; motor/ protein binding
AT5G22290	C02	688855	690483	anac089; anac089 (Arabidopsis NAC domain containing protein 89); transcription factor
AT5G22410	C02	634625	635900	peroxidase, putative
AT5G22650	C02	453759	456532	HD2B, HDT02, HDT2, ATHD2B, HDA4, HD2; HD2B
AT5G22650	C02	438498	439526	HD2B, HDT02, HDT2, ATHD2B, HDA4, HD2; HD2B
AT5G22650	C02	435987	437720	HD2B, HDT02, HDT2, ATHD2B, HDA4, HD2; HD2B
AT5G22650	C02	433518	435337	HD2B, HDT02, HDT2, ATHD2B, HDA4, HD2; HD2B
AT5G22650	C02	430255	432326	HD2B, HDT02, HDT2, ATHD2B, HDA4, HD2; HD2B
AT5G22650	C02	420154	421696	HD2B, HDT02, HDT2, ATHD2B, HDA4, HD2; HD2B
AT1G45688	C07	31723010	31724505	unknown protein
AT2G01830	C07	30139585	30144027	WOL, CRE1, WOL1, AHK4, ATCRE1; WOL
AT3G25710	C07	31572735	31574033	BHLH32, ATAIG1; BHLH32
