# Supplementary material for: Identification of Polymorphisms Associated with Drought Adaptation QTL in Brassica napus by Resequencing
Source: G3 (Bethesda). 2016 Jan 21;6(4):793–803. doi: 10.1534/g3.115.021279 (PMC4825650; doi:10.1534/g3.115.021279)
Supplement: Supporting Information [file supp_g3.115.021279_TableS6.xlsx]

## Sheet: Sheet1
Table S6. Summary of sequence coverage, polymorphism results and gene information for the 42 Brassica rapa candidate genes selected within the QTL.A10 QTL. Genes in bold carried polymorphisms for which KASP assays were designed and used in mapping.
Bra Gene#	At ortholog	GO Annotation	CDS size (bp)	No. SNPs
				5'	Synonymous	Nonsynonymous	Intronic	3'	SNP Density (%)
Bra008668	AT5G15850	Flower	720	0	0	0	0	0	0
Bra008669	AT5G15840	Flower	1101	0	0	0	0	0	0
Bra008674	AT5G15800	Flower	759	0	0	0	0	10	0.24
Bra008689	AT5G15580	Root	2691	0	0	0	0	0	0
Bra008740	AT5G14750	Root	594	0	0	0	2	11	0.39
Bra008781	AT5G14080	Flower	849	9	4	4	0	8	0.71
Bra008787	AT5G14010	Flower	462	2	1	0	0	1	0.8
Bra008802	AT5G13790	Flower	795	13	1	3	10	0	0.44
Bra008838	AT5G13300	Both	2481	0	6	0	8	4	0.28
Bra008839	AT5G13290	Both	1188	0	0	0	0	14	0.43
Bra008853	AT5G13140	Root	702	0	0	0	0	0	0
Bra008858	AT5G13080	Root	444	13	2	0	2	0	0.2
Bra008888	AT5G12430	Root	3657	18	8	8	1	1	0.48
Bra008889	AT5G12410	Flower	1098	3	5	1	8	0	0.46
Bra008890	AT5G12400	Root	5184	0	0	0	0	0	0
Bra008898	AT5G12330	Root	918	1	0	0	0	0	0.03
Bra008903	AT5G12250	Root	1347	2	0	0	0	0	0.06
Bra008937	AT5G11780	Flower	1479	0	3	2	0	1	0.15
Bra008955	AT5G11530	Flower	3321	0	0	0	3	0	0.03
Bra008966	AT5G11390	Root	1971	5	8	2	0	0	0.26
Bra008971	AT5G11320	Flower	1236	0	1	2	2	2	0.17
Bra008976	AT5G11260	Flower	495	4	0	0	1	0	0.16
Bra008979	AT5G11240	Flower	1851	19	0	1	1	1	0.32
Bra008995	AT5G11030	Root	1755	0	0	0	0	0	0
Bra008998	AT5G11000	Root	1167	0	0	0	0	0	0
Bra009011	AT5G10720	Root	2697	0	0	0	0	0	0
Bra009026	AT5G10510	Both	1725	0	0	0	0	0	0
Bra009029	AT5G10480	Root	531	0	0	0	0	0	0
Bra009047	AT5G10250	Root	1893	0	0	0	0	0	0
Bra009053	AT4G27010	Flower	1071	0	0	0	0	0	0
Bra009055	AT5G10140	Flower	621	0	0	0	0	0	0
Bra009075	AT2G19930	Flower	1038	0	0	0	0	0	0
Bra009081	AT5G09810	Root	1062	0	0	0	0	0	0
Bra009353	AT5G08580	Flower	1140	0	0	0	0	0	0
Bra009327	AT5G08180	Flower	471	0	0	0	0	0	0
Bra009287	AT5G07180	Flower	2811	0	2	1	15	1	0.27
Bra009221	AT5G06720	Flower	1077	0	0	0	0	0	0
Bra009209	AT5G06590	Flower	924	0	0	0	0	0	0
Bra009205	AT5G06550	Flower	1539	1	11	0	2	5	0.53
Bra009167	AT5G06170	Flower	1479	0	7	2	0	0	0.24
Bra009166	AT5G06140	Root	1173	1	8	0	3	7	0.32
Bra009156	AT5G05980	Root	2463	7	17	10	32	10	0.83
		Average	1475.7	2.3	2	0.9	2.1	1.8	0.24
