# Supplementary material for: Identification of Polymorphisms Associated with Drought Adaptation QTL in Brassica napus by Resequencing
Source: G3 (Bethesda). 2016 Jan 21;6(4):793–803. doi: 10.1534/g3.115.021279 (PMC4825650; doi:10.1534/g3.115.021279)
Supplement: Supporting Information [file supp_g3.115.021279_TableS7.xlsx]

## Sheet: Sheet1
Table S7. Comparison of A10 QTL model fit parameters generated using the original and NGS maps. LOD and R2 for days to flowering (DTF) in wet (1) and dry (2); root pulling force (RPF) in wet (3) and dry (4); and RPF conditional upon DTF (5) generated from genome-wide QTL scans using the original map (Fletcher et al. 2015) and NGS map (incorporating markers identified in this study).
			Nearest Marker			LOD			R2
	Trait		Original	NGS		Original	NGS		Original	NGS
1	DTF.wet		BSNP3510	A10_FLC		37.69	38.54		30.05	30.87
2	DTF.dry		BSNP3510	A10_FLC		24.19	24.35		28.97	29.11
3	RPF.wet		BSNP3510	Bra009063		13.73	16.25		18.46	22.75
4	RPF.dry		BSNP3510	A10_FLC		12.15	13.66		19.71	21.84
5	RPF.dry → DTF		BSNP3510	A10_FLC		3.24	3.9		5.66	6.77
