# Supplementary material for: Identification of Polymorphisms Associated with Drought Adaptation QTL in Brassica napus by Resequencing
Source: G3 (Bethesda). 2016 Jan 21;6(4):793–803. doi: 10.1534/g3.115.021279 (PMC4825650; doi:10.1534/g3.115.021279)
Supplement: Supporting Information [file supp_g3.115.021279_TableS8.xlsx]

## Sheet: Sheet1
Table S8. Summary of insertion presence among spring and winter types.
Name	ID	Type	Presence of insertion?
Campino	ASSYST-291	Spring	Yes
DH12075	ASSYST-505	Spring	Yes
Drakkar	ASSYST-238	Spring	Yes
IMC106RR	N/A	Spring	Yes
Kajsa	ASSYST-338	Spring	Yes
Mozart	ASSYST-302	Spring	Yes
Olga	ASSYST-280	Spring	No
Tanka	ASSYST-381	Spring	Yes
Tribune	ASSYST-307	Spring	No
Tribute	ASSYST-284	Spring	Yes
25629-3	ASSYST-182	Winter	No
Doral	ASSYST-140	Winter	Yes
Erox	ASSYST-116	Winter	Yes
Gülzower Ölquell	ASSYST-144	Winter	No
Janpol	ASSYST-146	Winter	No
Lirakotta	ASSYST-156	Winter	No
Quedlinburger Platzfester	ASSYST-167	Winter	No
Silona	ASSYST-201	Winter	No
Taisetsu	ASSYST-203	Winter	No
Wichita	PI 612846	Winter	No
